# Supplementary material for: Combined photophysical, NMR and theoretical (DFT) study on the interaction of a multi component system in the absence and presence of different biologically and environmentally important ions
Source: Royal Society of Chemistry journal article supplement (doi:10.1039/c5ra10414a), 2015-01-01
Supplement: c5ra10414a1.pdf [file c5ra10414a1.pdf]

*Supplementary Information for*

**Combined Photophysical, NMR and Theoretical (DFT) Study on the Interaction of a Multi Component System in Absence and Presence of Different Biologically and Environmentally Important ions**

Abhas Kumar Bhoi, Prabhat Kumar Sahu, Gaurav Jha, Anoop N. and Moloy Sarkar\*

School of Chemical Sciences,  
National Institute of Science Education and Research  
Bhubaneswar 751005, India

---

\*To whom correspondence should be addressed. Email: moloy Sarkar@gmail.com. Phone:

+91-674-2304037 Fax: +91-674-2302436.

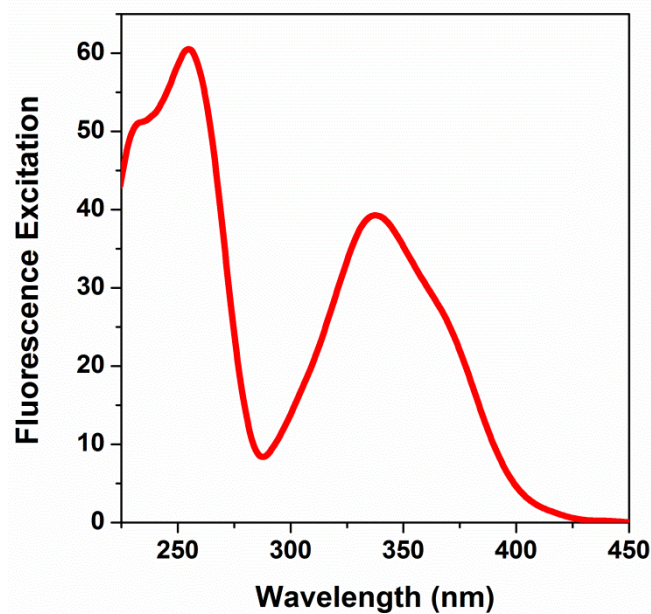

**Figure S1.** Fluorescence Excitation Spectra of DANSn2, in Acetonitrile, at  $\lambda_{\text{emi.}}=538$  nm

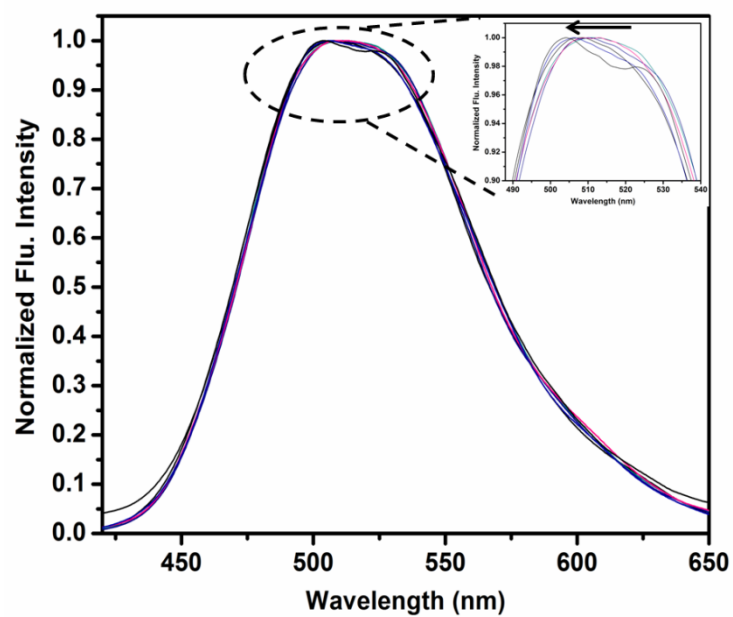

**Figure S2.** Normalized fluorescence emission spectra of DANSn2 upon increasing addition of Fluoride. Inset shows the small change in the position of emission maxima, and the arrow depicts the increasing fluoride concentration as well as the blue shift.

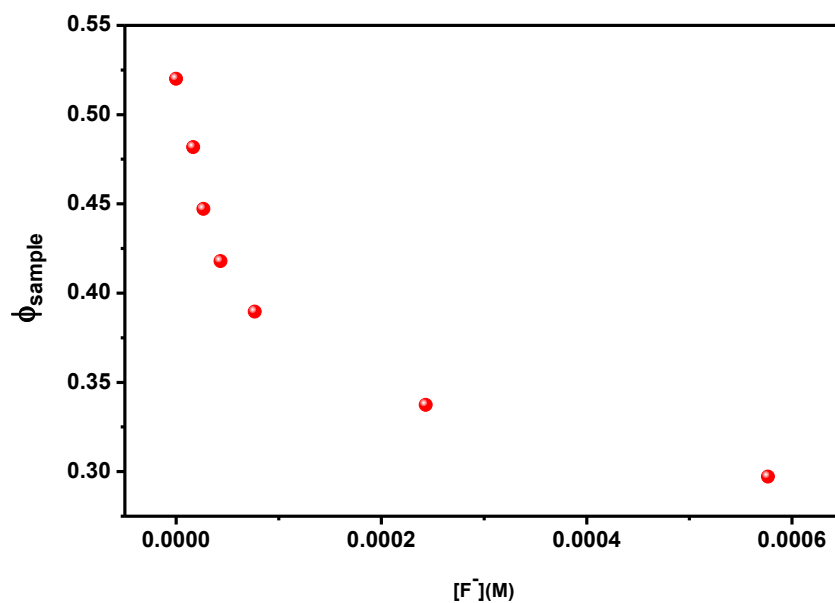

**Figure S3.** Change of quantum yield of DANSn2 with the concentration of fluoride ion.

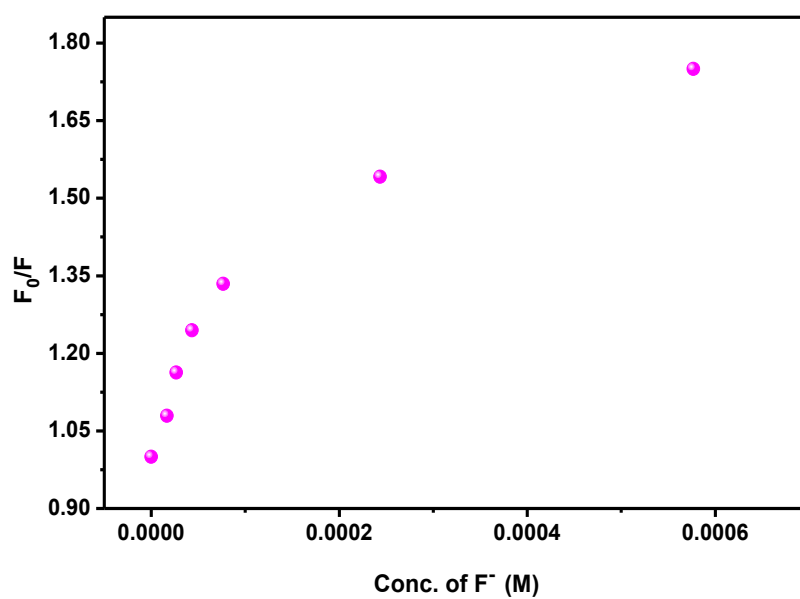

**Figure S4.** Variation of  $F_0/F$  of DANSn2 with the concentration of fluoride ion.  $F$  and  $F_0$  are fluorescence intensities of DANSn2 with and without addition of fluoride ion.

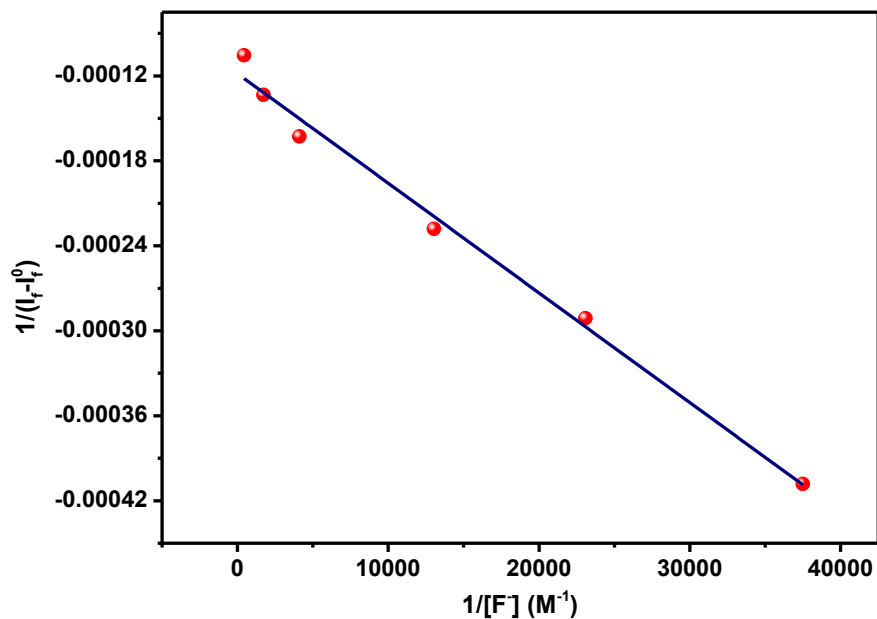

**Figure S5.** Benesi-Hildebrand plot for determination of binding constant of **DANSn2** ( $1.0 \times 10^{-5}$  M) with fluoride ion from steady state emission data.

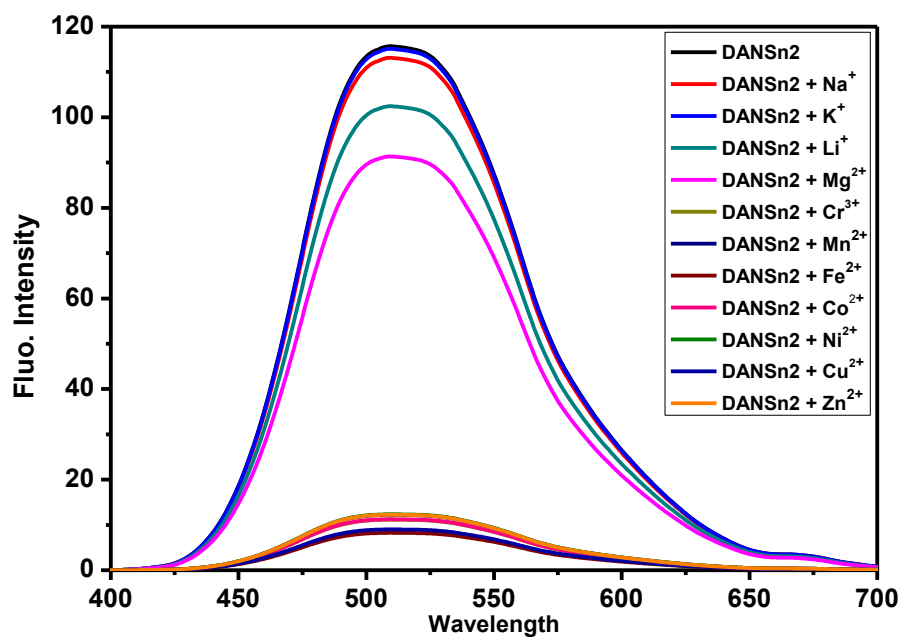

**Figure S6.** Fluorescence response of **DANSn2** in absence and presence of different metal ions.  $\lambda_{exc.}=445$  nm. Concentration of probe  $\sim 1.0 \times 10^{-5}$  M and metal ions  $\sim 1.0 \times 10^{-3}$  M.

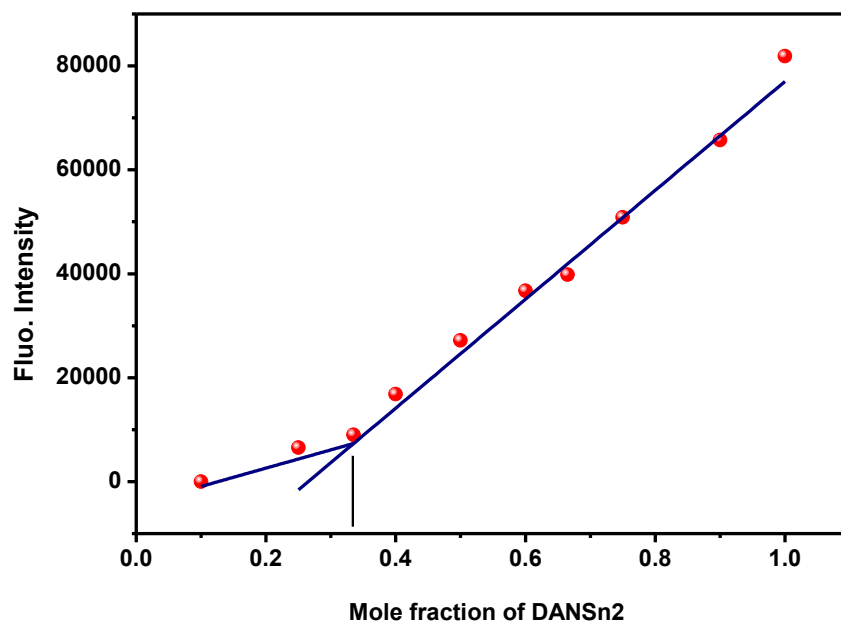

**Figure S7.** Jobs plot for the complexation of the DANSn2 with  $Zn^{2+}$  ions in ACN.  $\lambda_{exc.} = 338$  nm.

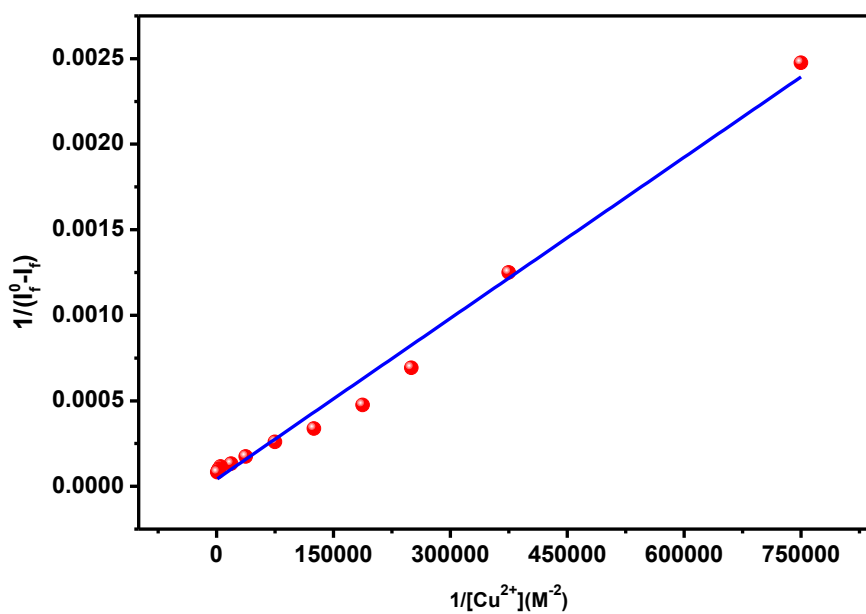

**Figure S8.** Benesi-Hildebrand plot for determination of binding constant of **DANSn2** ( $1.0 \times 10^{-5}$  M) with copper ion from steady state emission data.

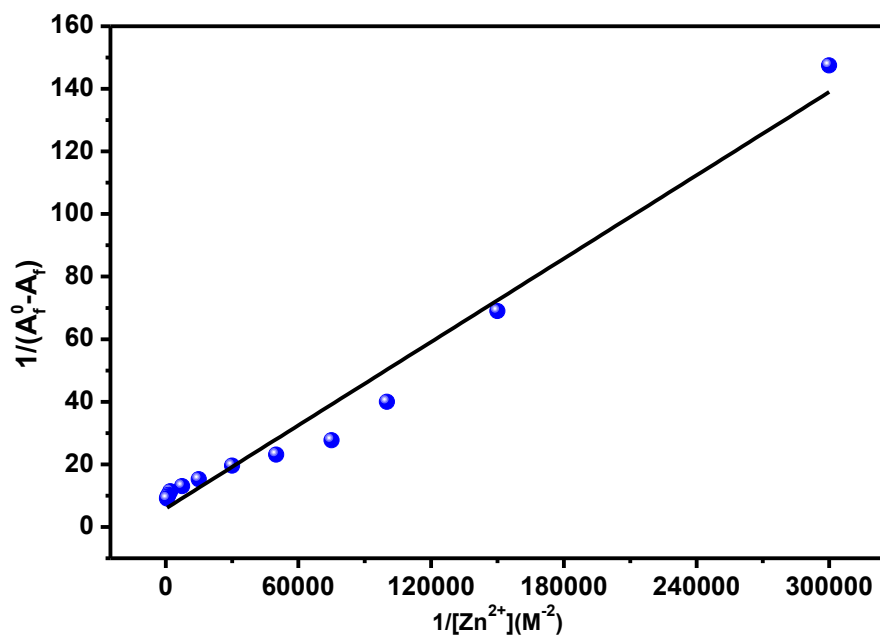

**Figure S9.** Benesi-Hildebrand plot for determination of binding constant of **DANSn2** ( $1.0 \times 10^{-5}$  M) with copper ion from steady state absorption data.

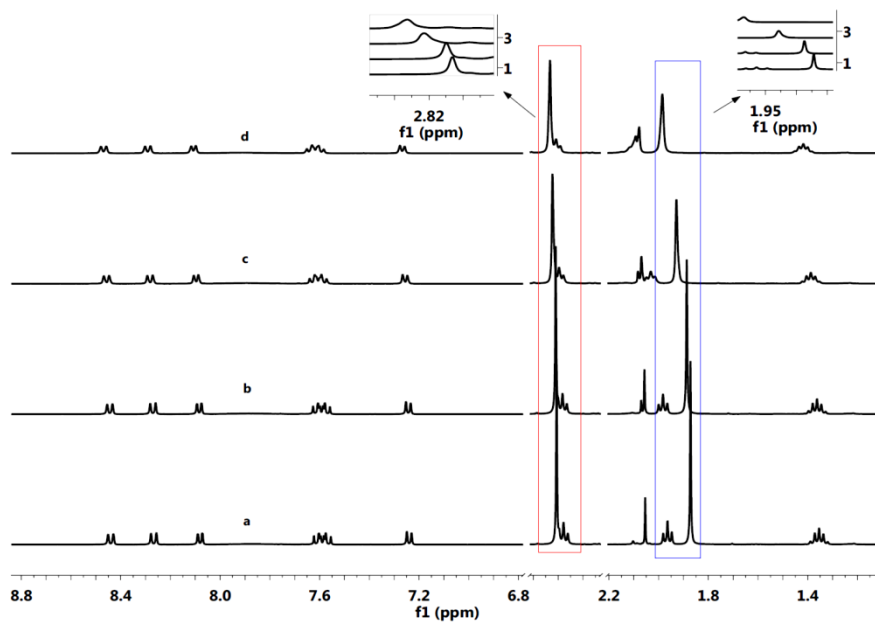

**Figure S10.** Zoomed  $^1\text{H}$  NMR spectra of DANSn2 in DMSO- $\text{d}_6$  in presence of (a) 0 eq., (b) 0.2 eq., (c) 0.5 eq., (d) 1.12 eq. of Zinc(II) perchlorate.

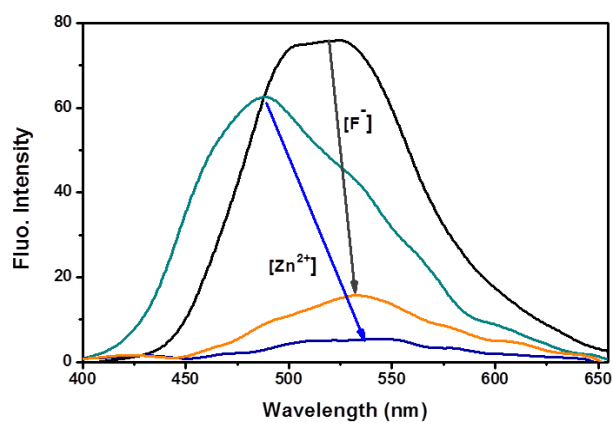

**Figure S11.** Change in emission profile of DANSn2 in Acetonitrile, upon addition of Zinc salt in presence of fluoride salt to evaluate the cooperative effect in ion binding.

**Table S1.** Binding Constants of DANSn2 with  $Zn^{2+}$  in the presence of  $F^-$ .

| Complexes                                  | Binding Constant ( $10^{-4}$ ) |
|--------------------------------------------|--------------------------------|
| DANSn2 + $Zn^{2+}$                         | 0.652 $M^{-2}$                 |
| DANSn2 + $Zn^{2+}$ (in presence of $F^-$ ) | 0.061 $M^{-2}$                 |

**Table S2.** Cartesian coordinates of the optimized structure of DANSn2.

| Center Number | Atomic Number | Coordinates(Angstroms) |           |           |
|---------------|---------------|------------------------|-----------|-----------|
|               |               | X                      | Y         | Z         |
| 1             | 16            | 2.144270               | -1.603074 | -0.702735 |
| 2             | 8             | 2.898375               | -2.64063  | -0.01398  |
| 3             | 8             | 2.1534                 | -1.50579  | -2.15398  |
| 4             | 7             | -4.07678               | 0.051844  | 0.385017  |
| 5             | 7             | 2.681125               | -0.15059  | -0.11566  |
| 6             | 1             | 2.118141               | 0.628387  | -0.48394  |
| 7             | 7             | 1.542065               | 2.487055  | 0.112497  |
| 8             | 6             | -3.95088               | 0.679565  | 1.700044  |
| 9             | 1             | -3.06505               | 0.309882  | 2.218832  |
| 10            | 1             | -4.8332                | 0.440206  | 2.300819  |
| 11            | 1             | -3.87001               | 1.776664  | 1.613934  |
| 12            | 6             | -2.86858               | 0.050085  | -0.35691  |
| 13            | 6             | -1.83048               | -0.8575   | 0.050983  |
| 14            | 6             | -0.56562               | -0.82472  | -0.60918  |
| 15            | 6             | 0.44625                | -1.71481  | -0.12333  |
| 16            | 6             | 2.81186                | -0.05502  | 1.345929  |
| 17            | 1             | 3.627733               | -0.71359  | 1.651417  |
| 18            | 1             | 1.89485                | -0.3954   | 1.855635  |
| 19            | 6             | 3.097889               | 1.388655  | 1.747705  |
| 20            | 1             | 3.337253               | 1.402728  | 2.81657   |
| 21            | 1             | 3.990338               | 1.745378  | 1.222315  |
| 22            | 6             | 1.90809                | 2.321993  | 1.522197  |
| 23            | 1             | 1.0377                 | 1.89551   | 2.036884  |
| 24            | 1             | 2.10645                | 3.307941  | 1.984576  |
| 25            | 6             | 0.197372               | 3.035943  | -0.00022  |
| 26            | 1             | -0.52701               | 2.336873  | 0.430284  |
| 27            | 1             | -0.05589               | 3.172701  | -1.05434  |
| 28            | 1             | 0.105824               | 4.011088  | 0.512477  |
| 29            | 6             | 2.49831                | 3.329897  | -0.59554  |
| 30            | 1             | 2.551973               | 4.344937  | -0.1615   |
| 31            | 1             | 2.200939               | 3.413645  | -1.64407  |
| 32            | 1             | 3.495689               | 2.884892  | -0.56625  |
| 33            | 6             | -2.06854               | -1.82541  | 1.064755  |
| 34            | 1             | -3.06419               | -1.88653  | 1.491194  |
| 35            | 6             | -1.08394               | -2.69189  | 1.464118  |
| 36            | 1             | -1.2841                | -3.4396   | 2.224396  |
| 37            | 6             | 0.202927               | -2.61346  | 0.885059  |
| 38            | 1             | 1.007104               | -3.26283  | 1.215556  |
| 39            | 6             | -2.66299               | 0.858394  | -1.45445  |
| 40            | 1             | -3.44492               | 1.52803   | -1.79532  |
| 41            | 6             | -1.4287                | 0.835869  | -2.1415   |
| 42            | 1             | -1.29837               | 1.473993  | -3.0108   |
| 43            | 6             | -0.38907               | 0.046835  | -1.72183  |
| 44            | 1             | 0.544952               | 0.040941  | -2.27008  |
| 45            | 6             | -5.24998               | 0.548661  | -0.31257  |
| 46            | 1             | -5.23397               | 1.642471  | -0.46045  |
| 47            | 1             | -6.13528               | 0.304259  | 0.280607  |
| 48            | 1             | -5.33793               | 0.061189  | -1.28587  |



**Table S3.** Cartesian coordinates of the optimized structure of the DANSn2...Cu<sup>2+</sup> complex.

| Center Number | Atomic Number | Coordinates(Angstroms) |           |           |
|---------------|---------------|------------------------|-----------|-----------|
|               |               | X                      | Y         | Z         |
| 1             | 16            | 1.435488               | 0.383797  | -0.692482 |
| 2             | 8             | 1.220706               | 0.848090  | -2.047125 |
| 3             | 8             | 1.790950               | 1.421625  | 0.361323  |
| 4             | 7             | -5.003300              | 0.364000  | 0.642356  |
| 5             | 7             | 2.591624               | -0.686600 | -0.430413 |
| 6             | 6             | -4.988250              | 0.067546  | 2.128038  |
| 7             | 1             | -4.097470              | -0.482435 | 2.416484  |
| 8             | 1             | -5.881130              | -0.504508 | 2.383620  |
| 9             | 1             | -5.009940              | 1.022101  | 2.662997  |
| 10            | 6             | -3.765170              | 0.832793  | 0.136230  |
| 11            | 6             | -2.573570              | -0.009300 | 0.202594  |
| 12            | 6             | -1.319270              | 0.544531  | -0.211434 |
| 13            | 6             | -0.157200              | -0.274253 | -0.138808 |
| 14            | 6             | 3.260894               | -1.374108 | -1.558280 |
| 15            | 1             | 3.325898               | -0.717989 | -2.434014 |
| 16            | 1             | 2.672499               | -2.255589 | -1.835852 |
| 17            | 6             | 4.650752               | -1.830137 | -1.112581 |
| 18            | 1             | 4.566533               | -2.557154 | -0.299112 |
| 19            | 1             | 5.093267               | -2.373278 | -1.953489 |
| 20            | 6             | -2.607330              | -1.356547 | 0.599908  |
| 21            | 1             | -3.539060              | -1.834103 | 0.896906  |
| 22            | 6             | -1.451010              | -2.133035 | 0.653529  |
| 23            | 1             | -1.511490              | -3.168227 | 0.974858  |
| 24            | 6             | -0.213810              | -1.586648 | 0.298770  |
| 25            | 1             | 0.693422               | -2.181317 | 0.350474  |
| 26            | 6             | -3.676800              | 2.119612  | -0.439177 |
| 27            | 1             | -4.552330              | 2.750719  | -0.522355 |
| 28            | 6             | -2.457110              | 2.632826  | -0.834411 |
| 29            | 1             | -2.398280              | 3.644265  | -1.225119 |
| 30            | 6             | -1.275890              | 1.871714  | -0.710598 |
| 31            | 1             | -0.338120              | 2.316147  | -1.028296 |
| 32            | 6             | -6.195430              | 1.231924  | 0.364821  |
| 33            | 1             | -6.125190              | 2.180986  | 0.906348  |
| 34            | 1             | -7.081930              | 0.70855   | 0.730009  |
| 35            | 1             | -6.299820              | 1.417022  | -0.706324 |
| 36            | 6             | 5.631500               | -0.708652 | -0.759449 |
| 37            | 1             | 6.653786               | -1.108062 | -0.765650 |
| 38            | 1             | 5.588417               | 0.083135  | -1.516690 |
| 39            | 7             | 5.436125               | -0.052385 | 0.576659  |
| 40            | 6             | 6.376764               | 1.100131  | 0.698855  |
| 41            | 1             | 6.242390               | 1.588958  | 1.667003  |
| 42            | 1             | 7.410406               | 0.740945  | 0.633234  |
| 43            | 1             | 6.202978               | 1.815112  | -0.109142 |
| 44            | 6             | 5.672723               | -1.004430 | 1.696011  |
| 45            | 1             | 6.670791               | -1.446106 | 1.596837  |
| 46            | 1             | 5.620023               | -0.468374 | 2.646056  |
| 47            | 1             | 4.925577               | -1.798721 | 1.687434  |
| 48            | 29            | 3.615309               | 0.659351  | 0.659997  |
| 49            | 29            | -5.564770              | -1.341746 | -0.459804 |

**Table S4.** Cartesian coordinates of the optimized structure of the DANSn2... F<sup>-</sup> complex.

| Center Number | Atomic Number | Coordinates(Angstroms) |          |          |
|---------------|---------------|------------------------|----------|----------|
|               |               | X                      | Y        | Z        |
| 1             | 16            | 0.886431               | 1.258176 | 1.125757 |
| 2             | 8             | 1.468032               | 2.570826 | 0.78898  |
| 3             | 8             | 0.717318               | 0.921313 | 2.542834 |
| 4             | 7             | -5.11765               | -0.61949 | -0.77733 |
| 5             | 7             | 1.611705               | 0.061748 | 0.391692 |
| 6             | 1             | 1.597671               | -1.27192 | 0.85182  |
| 7             | 7             | 5.74106                | -0.51759 | -0.57348 |
| 8             | 6             | -4.97363               | -0.72594 | -2.22568 |
| 9             | 1             | -4.154                 | -0.09354 | -2.57113 |
| 10            | 1             | -5.90029               | -0.39697 | -2.70938 |
| 11            | 1             | -4.76304               | -1.76459 | -2.53771 |
| 12            | 6             | -3.87316               | -0.75527 | -0.0865  |
| 13            | 6             | -2.9724                | 0.361311 | -0.10279 |
| 14            | 6             | -1.68957               | 0.236604 | 0.511004 |
| 15            | 6             | -0.79744               | 1.353783 | 0.439309 |
| 16            | 6             | 2.006558               | 0.26899  | -0.99408 |
| 17            | 1             | 1.478409               | 1.1185   | -1.45042 |
| 18            | 1             | 1.720165               | -0.62963 | -1.56124 |
| 19            | 6             | 3.515993               | 0.492563 | -1.13607 |
| 20            | 1             | 3.744355               | 0.662361 | -2.19747 |
| 21            | 1             | 3.794541               | 1.392432 | -0.57588 |
| 22            | 6             | 4.289684               | -0.70232 | -0.59363 |
| 23            | 1             | 3.956146               | -0.88199 | 0.432887 |
| 24            | 1             | 4.025485               | -1.6111  | -1.17652 |
| 25            | 6             | 6.372803               | -1.60714 | 0.145552 |
| 26            | 1             | 5.964617               | -1.66562 | 1.157793 |
| 27            | 1             | 7.452415               | -1.43345 | 0.21282  |
| 28            | 1             | 6.209021               | -2.58739 | -0.34623 |
| 29            | 6             | 6.29676                | -0.41154 | -1.90712 |
| 30            | 1             | 6.073351               | -1.30568 | -2.52618 |
| 31            | 1             | 7.384789               | -0.30261 | -1.84495 |
| 32            | 1             | 5.898488               | 0.46724  | -2.41928 |
| 33            | 6             | -3.34568               | 1.596764 | -0.69948 |
| 34            | 1             | -4.3489                | 1.695861 | -1.10122 |
| 35            | 6             | -2.46724               | 2.649366 | -0.73663 |
| 36            | 1             | -2.76492               | 3.592071 | -1.18764 |
| 37            | 6             | -1.17311               | 2.520447 | -0.17849 |
| 38            | 1             | -0.46204               | 3.339523 | -0.21068 |
| 39            | 6             | -3.51422               | -1.90623 | 0.577732 |
| 40            | 1             | -4.18878               | -2.75649 | 0.602515 |
| 41            | 6             | -2.25572               | -2.00626 | 1.21729  |
| 42            | 1             | -1.98796               | -2.92624 | 1.727566 |
| 43            | 6             | -1.35319               | -0.97599 | 1.178138 |
| 44            | 1             | -0.39035               | -1.08493 | 1.660296 |
| 45            | 6             | -6.19143               | -1.4708  | -0.30686 |
| 46            | 1             | -6.05302               | -2.53543 | -0.5713  |
| 47            | 1             | -7.13011               | -1.13578 | -0.76082 |
| 48            | 1             | -6.27844               | -1.39031 | 0.779336 |
| 49            | 9             | 1.617869               | -2.28279 | 1.084434 |

### Fluorescence Microscopy Studies.

Fluorescence microscopy studies have been performed to evaluate the utility of the present DANSn2 system as an imaging probe in live cells. Fluorescence images were taken after incubation with increasing concentration of DANSn2 (0 to 40  $\mu\text{M}$ ) to the tetrahymena cells for 2 h. It can be seen that the fluorescence images display blue emission due to presence of a slightly acidic medium inside the cell. The results shows that DANSn2 is cell-permeable and may be used for live cell imaging studies.

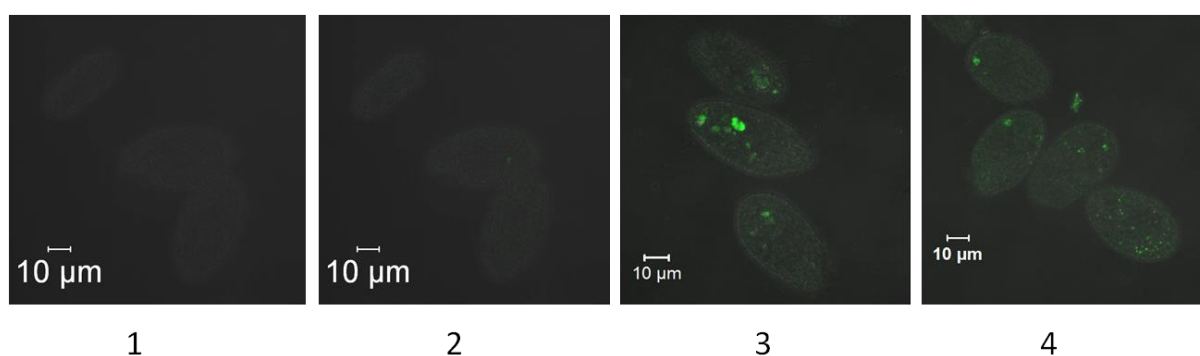

**Figure S12.** Fluorescence microscopy images of Tetrahymena cells (1) DIC image (2) after incubation with 0 $\mu\text{M}$  DNASn2 (3) 10 $\mu\text{M}$  DNASn2 (4) 10  $\mu\text{M}$  DANSn2+10 $\mu\text{M}$  Cu $^{2+}$ , for 2 hours.

We have also carried out the toxicity studies on the present system by employing the same cells used for imaging(Figure S11). The growth curve of tetrahymena cell was found to be similar in the presence or absence of DANSn2. Hence, DANSn2 is non-toxic under the present experimental condition.

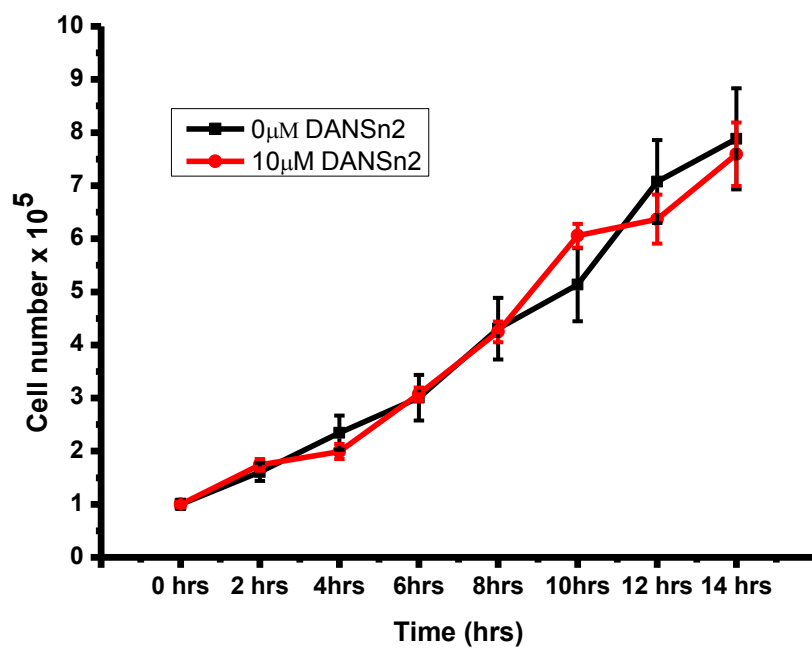

**Figure S13.** Growth curve of Tetrahymena: Tetrahymena cells were grown in presence of 0  $\mu\text{M}$  DANSn2 and 10  $\mu\text{M}$  DANSn2. DANSn2 was added when cells density reached  $1 \times 10^5$  /ml. The cell numbers were counted every 2 hours and the numbers of cells were plotted against time in hours.
